# Supplementary material for: Brown carbon in the continental outflow to the North Indian Ocean
Source: Royal Society of Chemistry journal article supplement (doi:10.1039/c9em00089e), 2019-01-01
Supplement: c9em00089e1.pdf [file c9em00089e1.pdf]

Supplementary information.

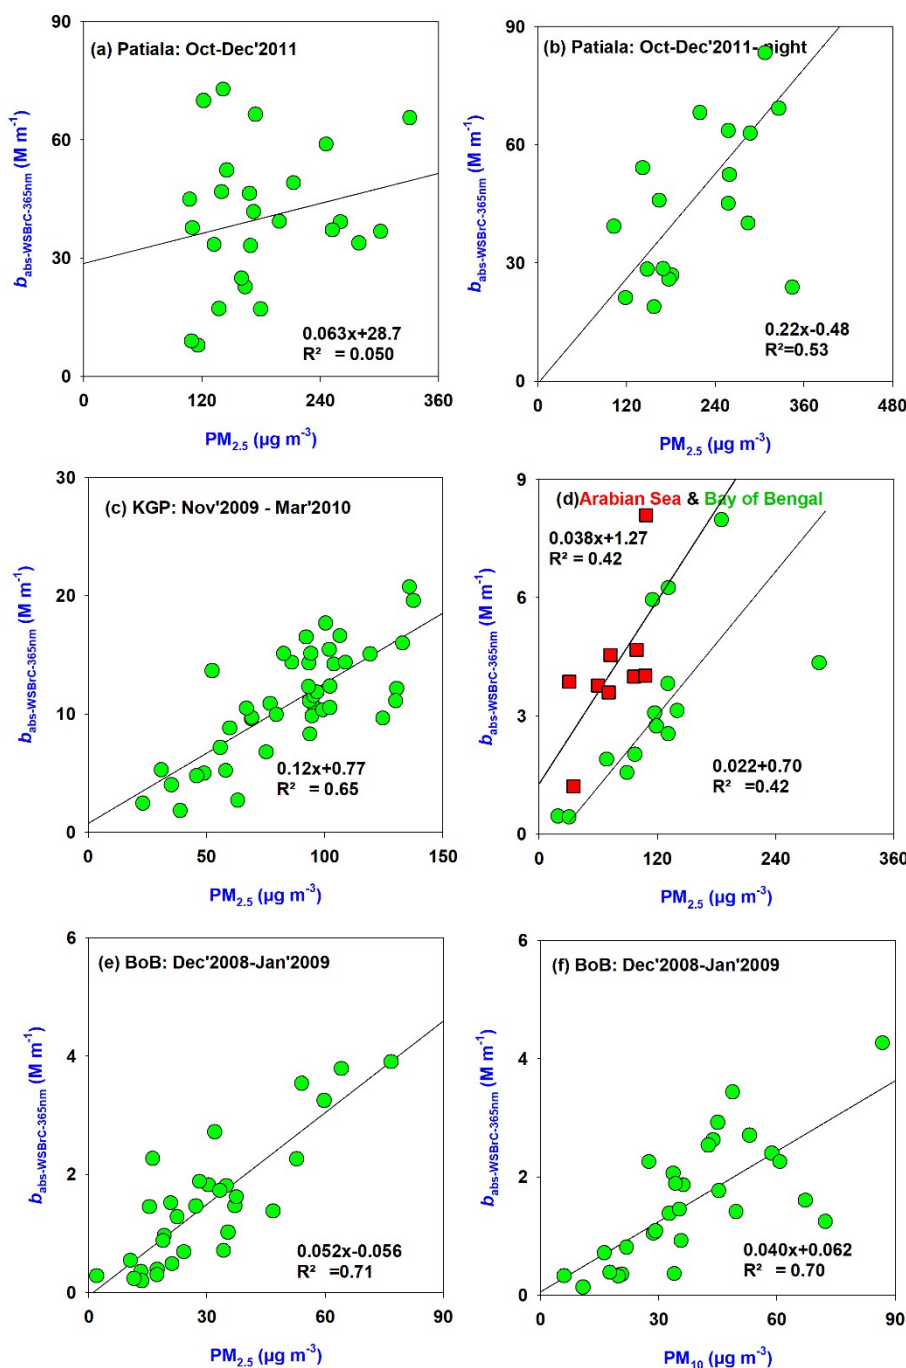

Figure S1: Linear relationships between mass absorption coefficient of water-soluble BrC at 365nm and particulate aerosol mass concentration in the Indo-Gangetic Plain outflow.
